# Supplementary material for: PlantCircNet: a database for plant circRNA–miRNA–mRNA regulatory networks
Source: Oxford University Press journal article supplement (doi:10.1093/database/bax089), 2017-01-01
Supplement: bax089_supp.pdf [file bax089_supp.pdf]

## Supplementary Information Tables S1–S5

**Table S1. The publicly available RNA-sequencing datasets used in this study**

| Species                        | Length of reads | NCBI Accession | Samples ID                                                                                                                                                                                                                                                                                                                                                                                                                                     |
|--------------------------------|-----------------|----------------|------------------------------------------------------------------------------------------------------------------------------------------------------------------------------------------------------------------------------------------------------------------------------------------------------------------------------------------------------------------------------------------------------------------------------------------------|
| <i>Arabidopsis thaliana</i>    | 101bp           | PRJNA218215    | SRR1004790, SRR1004791, SRR1004829, SRR1004830, SRR1004831, SRR1004832, SRR1004833, SRR1004834                                                                                                                                                                                                                                                                                                                                                 |
|                                | 100bp           | PRJNA213635    | SRR944362, SRR944363, SRR944364, SRR944365, SRR944366, SRR944367, SRR944368, SRR944369, SRR944370, SRR944371                                                                                                                                                                                                                                                                                                                                   |
| <i>Brachypodium distachyon</i> | 50bp            | PRJNA273411    | SRR1772223, SRR1772224, SRR1772225, SRR1772226, SRR1772227, SRR1772228, SRR1772229, SRR1772230, SRR1772231, SRR1772232, SRR1772233, SRR1772234, SRR1772235, SRR1772236, SRR1772237, SRR1772238, SRR1850587, SRR1850670, SRR1850671, SRR1850716                                                                                                                                                                                                 |
| <i>Glycine max</i>             | 50bp            | PRJNA285677    | SRR2048167, SRR2048168, SRR2048169, SRR2048170, SRR2048171, SRR2048172, SRR2048173, SRR2048174, SRR2048175, SRR2048176, SRR2048177, SRR2048178, SRR2048179, SRR2048180, SRR2048181, SRR2048182, SRR2048183, SRR2048184, SRR2048185, SRR2048186, SRR2048187, SRR2048188, SRR2048189, SRR2048190, SRR2048191, SRR2048192, SRR2048193, SRR2048194, SRR2048195, SRR2048196, SRR2048197, SRR2048198, SRR2048199, SRR2048200, SRR2048201, SRR2048202 |
| <i>Hordeum vulgare</i>         | 101bp           | PRJNA295482    | SRR2379177, SRR2379209, SRR2379274, SRR2379393, SRR2379445, SRR2379446, SRR2379577, SRR2379602, SRR2379664, SRR2379887, SRR2379950, SRR2379972, SRR2380048, SRR2380049, SRR2380116                                                                                                                                                                                                                                                             |
| <i>Oryza sativa</i>            | 101bp           | PRJNA215013    | SRR1005257, SRR1005258, SRR1005259, SRR1005260, SRR1005261, SRR1005262, SRR1005302, SRR1005303, SRR1005304, SRR1005305, SRR1005306, SRR1005307, SRR1005320, SRR1005321, SRR1005322, SRR1005323, SRR1005324, SRR1005325, SRR1005365, SRR1005366, SRR1005367, SRR1005368, SRR1005369, SRR1005370                                                                                                                                                 |
| <i>Solanum lycopersicum</i>    | 100bp           | PRJNA255271    | SRR1514810, SRR1609960, SRR1609961, SRR2102073                                                                                                                                                                                                                                                                                                                                                                                                 |
| <i>Zea mays</i>                | 100bp           | PRJNA287309    | SRR2070626, SRR2070627                                                                                                                                                                                                                                                                                                                                                                                                                         |

**Table S2. The reference genomes, transcriptomes and annotation files used in this study**

| <b>Species</b>                 | <b>Species ID</b> | <b>Common Name</b> | <b>Release Version</b> | <b>Source</b>                                                                                                   |
|--------------------------------|-------------------|--------------------|------------------------|-----------------------------------------------------------------------------------------------------------------|
| <i>Arabidopsis thaliana</i>    | ath               | Arabidopsis        | TAIR10                 | <a href="http://www.arabidopsis.org/">http://www.arabidopsis.org/</a>                                           |
| <i>Brachypodium distachyon</i> | bdi               | stiff brome        | v1.0                   | <a href="ftp://ftp.ensemblgenomes.org/pub/current/plants/">ftp://ftp.ensemblgenomes.org/pub/current/plants/</a> |
| <i>Glycine max</i>             | gma               | soybean            | V1.0                   | <a href="ftp://ftp.ensemblgenomes.org/pub/current/plants/">ftp://ftp.ensemblgenomes.org/pub/current/plants/</a> |
| <i>Hordeum vulgare</i>         | hvu               | barley             | ASM32608v1             | <a href="ftp://ftp.ensemblgenomes.org/pub/current/plants/">ftp://ftp.ensemblgenomes.org/pub/current/plants/</a> |
| <i>Oryza sativa</i>            | osa               | rice               | IRGSP-1.0              | <a href="ftp://ftp.ensemblgenomes.org/pub/current/plants/">ftp://ftp.ensemblgenomes.org/pub/current/plants/</a> |
| <i>Solanum lycopersicum</i>    | sly               | tomato             | SL2.50                 | <a href="ftp://ftp.ensemblgenomes.org/pub/current/plants/">ftp://ftp.ensemblgenomes.org/pub/current/plants/</a> |
| <i>Zea mays</i>                | zma               | maize              | AGPv3                  | <a href="ftp://ftp.ensemblgenomes.org/pub/current/plants/">ftp://ftp.ensemblgenomes.org/pub/current/plants/</a> |

**Table S3. Predicted circRNAs consistent with experimentally validated RNAs by comparison of back-spliced junction sites**

| Species                | Experimentally identified circRNAs | Chr   | Start     | End       | circRNA       | Reference                      |
|------------------------|------------------------------------|-------|-----------|-----------|---------------|--------------------------------|
| <i>Oryza sativa</i>    | Chr1_22121499_22122046             | Chr1  | 22121499  | 22122046  | OSA_circ00869 | <a href="#">PMID: 27739910</a> |
| <i>Oryza sativa</i>    | Chr11_13707993_13708205            | Chr11 | 13707993  | 13708205  | OSA_circ08079 | <a href="#">PMID: 27739910</a> |
| <i>Oryza sativa</i>    | Chr10_20890579_20890904            | Chr10 | 20890579  | 20890904  | OSA_circ07792 | <a href="#">PMID: 27739910</a> |
| <i>Oryza sativa</i>    | Chr10_23115090_23115651            | Chr10 | 23115090  | 23115651  | OSA_circ07893 | <a href="#">PMID: 27739911</a> |
| <i>Oryza sativa</i>    | Chr11_21179446_21180854            | Chr11 | 21179446  | 21180854  | OSA_circ08151 | <a href="#">PMID: 27739912</a> |
| <i>Oryza sativa</i>    | Chr12_3795288_3795604              | Chr12 | 3795288   | 3795604   | OSA_circ08363 | <a href="#">PMID: 27739913</a> |
| <i>Oryza sativa</i>    | Chr3_11550444_11551137             | Chr3  | 11550444  | 11551137  | OSA_circ03522 | <a href="#">PMID: 27739914</a> |
| <i>Oryza sativa</i>    | Chr4_29982442_29982821             | Chr4  | 29982442  | 29982821  | OSA_circ04545 | <a href="#">PMID: 27739915</a> |
| <i>Oryza sativa</i>    | Chr5_17342446_17342852             | Chr5  | 17342446  | 17342852  | OSA_circ05013 | <a href="#">PMID: 27739916</a> |
| <i>Oryza sativa</i>    | Chr5_28580407_28580547             | Chr5  | 28580407  | 28580547  | OSA_circ05293 | <a href="#">PMID: 27739917</a> |
| <i>Oryza sativa</i>    | Chr5_29522019_29522678             | Chr5  | 29522019  | 29522678  | OSA_circ05328 | <a href="#">PMID: 27739918</a> |
| <i>Oryza sativa</i>    | Chr5_3617186_3617467               | Chr5  | 3617186   | 3617467   | OSA_circ04874 | <a href="#">PMID: 27739919</a> |
| <i>Oryza sativa</i>    | Chr7_11593140_11593419             | Chr7  | 11593140  | 11593419  | OSA_circ06066 | <a href="#">PMID: 27739920</a> |
| <i>Oryza sativa</i>    | Chr7_28426089_28426740             | Chr7  | 28426089  | 28426740  | OSA_circ06338 | <a href="#">PMID: 27739921</a> |
| <i>Oryza sativa</i>    | Chr8_19735841_19736366             | Chr8  | 19735841  | 19736366  |               | <a href="#">PMID: 27739922</a> |
| <i>Oryza sativa</i>    | Chr3_267627_268062                 | Chr3  | 267627    | 268062    | OSA_circ09450 | <a href="#">PMID: 27739923</a> |
| <i>Oryza sativa</i>    | Chr4_35476588_35477345             | Chr4  | 35476588  | 35477345  | OSA_circ04754 | <a href="#">PMID: 27739924</a> |
| <i>Oryza sativa</i>    | Os_ciR133                          | Chr3  | 11550444  | 11551137  | OSA_circ03522 | <a href="#">PMID: 26204923</a> |
| <i>Oryza sativa</i>    | Os_ciR182                          | Chr5  | 29522019  | 29522678  | OSA_circ05328 | <a href="#">PMID: 26204923</a> |
| <i>Oryza sativa</i>    | Os_ciR190                          | Chr5  | 3617186   | 3617467   | OSA_circ04874 | <a href="#">PMID: 26204923</a> |
| <i>Oryza sativa</i>    | Os_ciR158                          | Chr1  | 21424261  | 21426198  | OSA_circ00838 | <a href="#">PMID: 26204923</a> |
| <i>Oryza sativa</i>    | Os_ciR308                          | Chr11 | 21179446  | 21180854  | OSA_circ08150 | <a href="#">PMID: 26204923</a> |
| <i>Oryza sativa</i>    | Os_ciR455                          | Chr5  | 28580407  | 28580547  | OSA_circ05293 | <a href="#">PMID: 26204923</a> |
| <i>Oryza sativa</i>    | Os_ciR207                          | Chr3  | 27106436  | 27107773  | OSA_circ09523 | <a href="#">PMID: 26204923</a> |
| <i>Oryza sativa</i>    | Os_ciR239                          | Chr3  | 30220074  | 30221928  | OSA_circ11640 | <a href="#">PMID: 26204923</a> |
| <i>Oryza sativa</i>    | Os_ciR198                          | Chr7  | 28426089  | 28426740  | OSA_circ06338 | <a href="#">PMID: 26204923</a> |
| <i>Oryza sativa</i>    | Os_ciR300                          | Chr5  | 17342446  | 17342852  | OSA_circ05013 | <a href="#">PMID: 26204923</a> |
| <i>Hordeum vulgare</i> | Cax2_circular RNA                  | Chr4  | 356281355 | 356282249 | HVU_circ03367 | <a href="#">PMID: 27375638</a> |

|                        |                                                                     |                     |           |           |               |                                |
|------------------------|---------------------------------------------------------------------|---------------------|-----------|-----------|---------------|--------------------------------|
| <i>Hordeum vulgare</i> | Ctr1 like_circular RNA                                              | Chr3                | 351423944 | 351425007 | HVU_circ03016 | <a href="#">PMID: 27375639</a> |
| <i>Hordeum vulgare</i> | MicroRNA1126_circular RNA                                           | Chr2                | 467982888 | 467983386 | HVU_circ02772 | <a href="#">PMID: 27375640</a> |
| <i>Hordeum vulgare</i> | Aux1_circular RNA                                                   | Chr3                | 486789367 | 486789848 | HVU_circ00990 | <a href="#">PMID: 27375641</a> |
| <i>Hordeum vulgare</i> | AbcI3_circular RNA                                                  | Morex_contig1661226 | 956       | 1173      |               | <a href="#">PMID: 27375642</a> |
| <i>Hordeum vulgare</i> | 18S rRNA_circular RNA1                                              | Chr1                | 429515268 | 429515439 | HVU_circ02592 | <a href="#">PMID: 27375643</a> |
| <i>Hordeum vulgare</i> | 18S rRNA_circular RNA2                                              | Chr1                | 429515283 | 429515435 | HVU_circ02596 | <a href="#">PMID: 27375644</a> |
| <i>Hordeum vulgare</i> | 18S rRNA_circular RNA3                                              | Chr1                | 429515253 | 429515394 | HVU_circ02588 | <a href="#">PMID: 27375645</a> |
| <i>Hordeum vulgare</i> | 18S rRNA_circular RNA4                                              | Chr1                | 429515283 | 429515394 | HVU_circ02595 | <a href="#">PMID: 27375646</a> |
| <i>Hordeum vulgare</i> | 18S rRNA_circular RNA5                                              | Chr1                | 429515275 | 429515370 | HVU_circ02104 | <a href="#">PMID: 27375647</a> |
| <i>Hordeum vulgare</i> | 18S rRNA_circular RNA6                                              | Chr1                | 429515253 | 429515403 | HVU_circ02589 | <a href="#">PMID: 27375648</a> |
| <i>Hordeum vulgare</i> | 18S rRNA_circular RNA7                                              | Chr1                | 429513196 | 429513343 |               | <a href="#">PMID: 27375649</a> |
| <i>Hordeum vulgare</i> | Internal transcribed spacer 2 of<br>18S,5.8S,26S rRNA_circular RNA1 | Chr1                | 429512475 | 429512569 | HVU_circ02578 | <a href="#">PMID: 27375650</a> |
| <i>Hordeum vulgare</i> | Internal transcribed spacer 2 of<br>18S,5.8S,26S rRNA_circular RNA2 | Chr1                | 177434203 | 177434347 |               | <a href="#">PMID: 27375651</a> |
| <i>Hordeum vulgare</i> | Nad9_circular RNA                                                   | Morex_contig_70567  | 2809      | 3204      |               | <a href="#">PMID: 27375652</a> |
| <i>Hordeum vulgare</i> | Mit. Apocytochrome b_circular RNA                                   | Morex_contig_42365  | 12844     | 13477     |               | <a href="#">PMID: 27375653</a> |
| <i>Hordeum vulgare</i> | Cox1_circular RNA1                                                  | Chr1                | 23865393  | 238657407 |               | <a href="#">PMID: 27375654</a> |
| <i>Hordeum vulgare</i> | Cox1_circular RNA2                                                  | Chr1                | 23865228  | 23865597  | HVU_circ02390 | <a href="#">PMID: 27375655</a> |
| <i>Hordeum vulgare</i> | Cox1_circular RNA3                                                  | Chr1                | 23865348  | 23865740  | HVU_circ00286 | <a href="#">PMID: 27375656</a> |
| <i>Hordeum vulgare</i> | Cox1_circular RNA4                                                  | Chr1                | 23864364  | 23866057  | HVU_circ00336 | <a href="#">PMID: 27375657</a> |
| <i>Hordeum vulgare</i> | Cox1_circular RNA5                                                  | Chr1                | 23864474  | 23866037  | HVU_circ00155 | <a href="#">PMID: 27375658</a> |
| <i>Hordeum vulgare</i> | Cox1_circular RNA6                                                  | Chr1                | 23864318  | 23866037  | HVU_circ00037 | <a href="#">PMID: 27375659</a> |
| <i>Hordeum vulgare</i> | Cystathionine beta lyase_circular RNA                               | Chr7                | 53946083  | 53946582  | HVU_circ01734 | <a href="#">PMID: 27375660</a> |
| <i>Hordeum vulgare</i> | BZip11_circular RNA                                                 | Chr6                | 52088926  | 52089401  | HVU_circ03830 | <a href="#">PMID: 27375661</a> |
| <i>Hordeum vulgare</i> | ADP ribosylation factor 1_circular RNA                              | Chr1                | 389129363 | 389130325 | HVU_circ02532 | <a href="#">PMID: 27375662</a> |
| <i>Hordeum vulgare</i> | Sec23/Sec24 transport protein_circular<br>RNA                       | Chr2                | 482080734 | 482081397 | HVU_circ00698 | <a href="#">PMID: 27375663</a> |
| <i>Hordeum vulgare</i> | Fumarase 2_circular RNA                                             | Chr4                | 243159573 | 243159671 |               | <a href="#">PMID: 27375664</a> |
| <i>Hordeum vulgare</i> | Inositol transporter 2_circular RNA                                 | Chr2                | 483514445 | 483514888 | HVU_circ00699 | <a href="#">PMID: 27375665</a> |

|                        |                                                                |                     |           |           |               |                                |
|------------------------|----------------------------------------------------------------|---------------------|-----------|-----------|---------------|--------------------------------|
| <i>Hordeum vulgare</i> | Formin like protein 20_circular RNA1                           | Chr4                | 491530198 | 491530553 |               | <a href="#">PMID: 27375666</a> |
| <i>Hordeum vulgare</i> | Formin like protein 20_circular RNA1                           | Chr4                | 491530332 | 491530553 |               | <a href="#">PMID: 27375667</a> |
| <i>Hordeum vulgare</i> | Alpha mannosidase 1_circular RNA                               | Chr2                | 566491430 | 566492027 | HVU_circ00798 | <a href="#">PMID: 27375668</a> |
| <i>Hordeum vulgare</i> | Chromosome segregation protein_circular RNA                    | Chr5                | 361207403 | 361207861 |               | <a href="#">PMID: 27375669</a> |
| <i>Hordeum vulgare</i> | Laccase 12_circular RNA                                        | Chr3                | 499962355 | 499962651 | HVU_circ03115 | <a href="#">PMID: 27375670</a> |
| <i>Hordeum vulgare</i> | ARID/BRIGHT DNA binding protein_circular RNA                   | Chr2                | 532048153 | 532048410 | HVU_circ02138 | <a href="#">PMID: 27375671</a> |
| <i>Hordeum vulgare</i> | Ubiquitin conjugating enzyme 11_circular RNA                   | Chr3                | 473869516 | 473869731 | HVU_circ03099 | <a href="#">PMID: 27375672</a> |
| <i>Hordeum vulgare</i> | Probable microtubule stabilizing protein_circular RNA          | Chr4                | 330511991 | 330512323 |               | <a href="#">PMID: 27375673</a> |
| <i>Hordeum vulgare</i> | RNA binding (RRM/RBD/RNP motifs) protein_circular RNA          | Chr4                | 252670767 | 252671078 | HVU_circ01152 | <a href="#">PMID: 27375674</a> |
| <i>Hordeum vulgare</i> | RNA binding (RRM/RBD/RNP motifs) protein_circular RNA          | Chr6                | 308455217 | 308455370 | HVU_circ01625 | <a href="#">PMID: 27375675</a> |
| <i>Hordeum vulgare</i> | RNA binding (RRM/RBD/RNP motifs) protein_circular RNA          | Chr6                | 260427394 | 260427518 | HVU_circ01604 | <a href="#">PMID: 27375676</a> |
| <i>Hordeum vulgare</i> | Ribosomal protein L30/L7_circular RNA                          | Chr5                | 524054971 | 524055497 | HVU_circ01625 | <a href="#">PMID: 27375677</a> |
| <i>Hordeum vulgare</i> | Transducin/WD40 repeat like protein_circular RNA               | Chr5                | 484562574 | 484563329 | HVU_circ01416 | <a href="#">PMID: 27375678</a> |
| <i>Hordeum vulgare</i> | Abscisic acid responsive (TB2/DP1, HVA22) protein_circular RNA | Chr6                | 20988426  | 20990992  | HVU_circ01496 | <a href="#">PMID: 27375679</a> |
| <i>Hordeum vulgare</i> | Far upstream element binding protein 2_circular RNA            | Chr6                | 245908278 | 245908734 | HVU_circ03867 | <a href="#">PMID: 27375680</a> |
| <i>Hordeum vulgare</i> | Sec independent protein translocase_circular RNA               | Morex_contig_106453 | 2137      | 3175      |               | <a href="#">PMID: 27375681</a> |
| <i>Hordeum vulgare</i> | Ubiquitin specific protease 17_circular RNA                    | Chr7                | 307483097 | 307485269 | HVU_circ04178 | <a href="#">PMID: 27375682</a> |

|                        |                                                            |      |           |           |               |                                |
|------------------------|------------------------------------------------------------|------|-----------|-----------|---------------|--------------------------------|
| <i>Hordeum vulgare</i> | Probable KH domain containing splicing factor_circular RNA | Chr7 | 457516955 | 457517152 | HVU_circ04202 | <a href="#">PMID: 27375683</a> |
| <i>Hordeum vulgare</i> | Ribosomal protein L6_circular RNA                          | Chr6 | 245896672 | 245897042 | HVU_circ01588 | <a href="#">PMID: 27375684</a> |
| <i>Hordeum vulgare</i> | Glycyl tRNA synthetase 2_circular RNA2                     | Chr6 | 268555508 | 268556210 | HVU_circ01610 | <a href="#">PMID: 27375685</a> |
| <i>Hordeum vulgare</i> | Glycyl tRNA synthetase 2_circular RNA2                     | Chr6 | 268555508 | 268556362 | HVU_circ01611 | <a href="#">PMID: 27375686</a> |
| <i>Hordeum vulgare</i> | Kinesin related protein 11 like_circular RNA               | Chr1 | 128008822 | 128014221 | HVU_circ00397 | <a href="#">PMID: 27375687</a> |
| <i>Hordeum vulgare</i> | SAD1/UNC 84 domain protein 2_circular RNA                  | Chr1 | 60689841  | 60690191  | HVU_circ00356 | <a href="#">PMID: 27375688</a> |
| <i>Hordeum vulgare</i> | Probable beta-1-4-glucosyltransferase_circular RNA         | Chr4 | 71095325  | 71097097  | HVU_circ01081 | <a href="#">PMID: 27375689</a> |
| <i>Hordeum vulgare</i> | Unknown_circular RNA                                       | Chr7 | 4237959   | 4238849   |               | <a href="#">PMID: 27375690</a> |
| <i>Hordeum vulgare</i> | Unknown_circular RNA                                       | Chr2 | 476367671 | 476368169 | HVU_circ02134 | <a href="#">PMID: 27375691</a> |
| <i>Hordeum vulgare</i> | Probable long non coding RNA_circular RNA                  | Chr2 | 605441109 | 605441443 | HVU_circ02152 | <a href="#">PMID: 27375692</a> |
| <i>Hordeum vulgare</i> | Unknown_circular RNA                                       | Chr3 | 100501939 | 100502294 | HVU_circ02165 | <a href="#">PMID: 27375693</a> |
| <i>Hordeum vulgare</i> | Probable long non coding RNA_circular RNA                  | Chr4 | 247058951 | 247059280 | HVU_circ03322 | <a href="#">PMID: 27375694</a> |
| <i>Hordeum vulgare</i> | Probable aminopeptidase_circular RNA                       | Chr5 | 286201637 | 286202872 | HVU_circ03589 | <a href="#">PMID: 27375695</a> |
| <i>Hordeum vulgare</i> | Unknown_circular RNA                                       | Chr5 | 6888869   | 6889034   | HVU_circ03486 | <a href="#">PMID: 27375696</a> |
| <i>Hordeum vulgare</i> | Probable long non coding RNA_circular RNA                  | Chr5 | 53926495  | 53926935  |               | <a href="#">PMID: 27375697</a> |
| <i>Hordeum vulgare</i> | Probable long non coding RNA_circular RNA                  | Chr1 | 363958561 | 363959513 | HVU_circ02523 | <a href="#">PMID: 27375697</a> |

**Table S4. Gene ontology (GO) enrichment analysis for the genes in the miR156a-related network**

|            |                                                                          | Biological Process                                                                                    |          |
|------------|--------------------------------------------------------------------------|-------------------------------------------------------------------------------------------------------|----------|
| GO Term    | Description                                                              | Genes                                                                                                 | P-value  |
| GO:0000103 | sulfate assimilation                                                     | [AT2G17640]                                                                                           | 1.88E-02 |
| GO:0000302 | response to reactive oxygen species                                      | [AT2G37860]                                                                                           | 3.24E-02 |
| GO:0006355 | regulation of transcription, DNA-templated                               | [AT2G42200] [AT1G27360] [AT1G53160]<br>[AT3G57920] [AT1G69170] [AT5G50570]<br>[AT3G15270] [AT5G43270] | 5.36E-04 |
| GO:0006535 | cysteine biosynthetic process from serine                                | [AT2G17640]                                                                                           | 1.88E-02 |
| GO:0009267 | cellular response to starvation                                          | [AT3G62420]                                                                                           | 8.83E-03 |
| GO:0009648 | photoperiodism                                                           | [AT2G37860]                                                                                           | 7.57E-03 |
| GO:0009827 | plant-type cell wall modification                                        | [AT2G33810] [AT3G57920]                                                                               | 2.00E-02 |
| GO:0009860 | pollen tube growth                                                       | [AT2G33810] [AT3G57920]                                                                               | 3.79E-02 |
| GO:0009886 | post-embryonic animal morphogenesis                                      | [AT2G33810]                                                                                           | 7.57E-03 |
| GO:0009911 | positive regulation of flower development                                | [AT2G33810]                                                                                           | 4.70E-02 |
| GO:0010038 | response to metal ion                                                    | [AT1G03980]                                                                                           | 1.01E-02 |
| GO:0010228 | vegetative to reproductive phase transition of meristem                  | [AT2G42200] [AT2G33810] [AT3G57920]                                                                   | 5.79E-03 |
| GO:0010229 | inflorescence development                                                | [AT2G33810]                                                                                           | 2.38E-02 |
| GO:0010321 | regulation of vegetative phase change                                    | [AT1G53160] [AT2G33810] [AT3G15270]                                                                   | 6.50E-08 |
| GO:0010358 | leaf shaping                                                             | [AT1G27370]                                                                                           | 1.01E-02 |
| GO:0046938 | phytochelatin biosynthetic process                                       | [AT1G03980]                                                                                           | 3.79E-03 |
| GO:0048366 | leaf development                                                         | [AT2G42200] [AT2G37860]                                                                               | 7.84E-03 |
| GO:0048507 | meristem development                                                     | [AT2G33810]                                                                                           | 3.49E-02 |
| GO:0048510 | regulation of timing of transition from vegetative to reproductive phase | [AT1G27360] [AT1G27370] [AT5G43270]                                                                   | 9.02E-06 |
| GO:0048653 | anther development                                                       | [AT2G42200] [AT3G57920] [AT5G50570]<br>[AT5G50670] [AT5G43270]                                        | 1.76E-08 |
| GO:2000025 | regulation of leaf formation                                             | [AT2G42200]                                                                                           | 3.79E-03 |
| GO:2000693 | positive regulation of seed maturation                                   | [AT3G62420]                                                                                           | 5.06E-03 |

| <b>Molecular Function</b> |                                                              |                                                                                                                                              |                |
|---------------------------|--------------------------------------------------------------|----------------------------------------------------------------------------------------------------------------------------------------------|----------------|
| <b>GO Term</b>            | <b>Description</b>                                           | <b>Genes</b>                                                                                                                                 | <b>P-value</b> |
| GO:0003700                | transcription factor activity, sequence-specific DNA binding | [AT2G42200] [AT1G27360] [AT1G53160]<br>[AT2G33810] [AT3G57920] [AT1G69170]<br>[AT5G50570] [AT3G15270] [AT1G27370]<br>[AT3G62420] [AT5G43270] | 4.85E-06       |
| GO:0009001                | serine O-acetyltransferase activity                          | [AT2G17640]                                                                                                                                  | 7.57E-03       |
| GO:0016756                | glutathione gamma-glutamylcysteinyltransferase activity      | [AT1G03980]                                                                                                                                  | 7.57E-03       |

| <b>Cellular Component</b> |                    |                                                                                                                                                                                                                                                                   |                |
|---------------------------|--------------------|-------------------------------------------------------------------------------------------------------------------------------------------------------------------------------------------------------------------------------------------------------------------|----------------|
| <b>GO Term</b>            | <b>Description</b> | <b>Genes</b>                                                                                                                                                                                                                                                      | <b>P-value</b> |
| GO:0005634                | nucleus            | [AT2G42200] [AT2G36810] [AT1G27360]<br>[AT1G26890] [AT1G05910] [AT1G53160]<br>[AT5G25560] [AT4G35170] [AT2G33810]<br>[AT2G21840] [AT3G57920] [AT1G69170]<br>[AT5G50570] [AT3G15270] [AT1G22000]<br>[AT1G27370] [AT3G62420] [AT5G50670]<br>[AT4G24270] [AT5G43270] | 2.10E-03       |



**Table S5. The expression levels of circRNAs in the miR156a-related network**

| Tools    | Name          | Treatment           |             |              |             |               |             |                   |               |                       |        |   |
|----------|---------------|---------------------|-------------|--------------|-------------|---------------|-------------|-------------------|---------------|-----------------------|--------|---|
|          |               | E2LLA               | E2HL30<br>A | E2HL30<br>B  | E2HL2<br>HA | E2HL2<br>Hb   | TNR1L<br>LA | TNR1H<br>L30A     | TNR1H<br>L2HA |                       |        |   |
| Finder   | ATH_circ03766 | 0                   | 0           | 0            | 0           | 0             | 0           | 0                 | 0.0525        | 0                     |        |   |
| Finder   | ATH_circ03768 | 0                   | 0           | 0            | 0           | 0             | 0           | 0                 | 0.0525        | 0                     |        |   |
| Finder   | ATH_circ05254 | 0                   | 0           | 0            | 0.0334      | 0             | 0           | 0                 | 0             | 0                     |        |   |
| UROBORUS | ATH_circ09695 | 0                   | 0           | 0            | 0           | 0             | 0           | 0                 | 0             | 0.0147                |        |   |
| UROBORUS | ATH_circ09697 | 0                   | 0.0298      | 0            | 0           | 0             | 0           | 0                 | 0             | 0                     |        |   |
| UROBORUS | ATH_circ09698 | 0.0143              | 0           | 0            | 0.0167      | 0             | 0           | 0                 | 0             | 0                     |        |   |
| UROBORUS | ATH_circ09699 | 0.0428              | 0.1192      | 0.1124       | 0.3177      | 0.2040        | 0.0759      | 0.0787            | 0.1761        |                       |        |   |
| UROBORUS | ATH_circ09700 | 0                   | 0           | 0            | 0.0167      | 0             | 0           | 0                 | 0             | 0.0147                |        |   |
| UROBORUS | ATH_circ09701 | 0.0143              | 0           | 0            | 0           | 0.0170        | 0.0190      | 0.0262            | 0             |                       |        |   |
|          |               | <b>No treatment</b> |             | <b>4 CEL</b> |             | <b>37 CEL</b> |             | <b>200mM NaCl</b> |               | <b>300mM mannitol</b> |        |   |
| UROBORUS | ATH_circ09695 | 0                   | 0           | 0            | 0           | 0             | 0           | 0                 | 0             | 0                     | 0.0388 | 0 |
| UROBORUS | ATH_circ09696 | 0.0511              | 0           | 0            | 0           | 0             | 0           | 0                 | 0             | 0                     | 0      | 0 |
| UROBORUS | ATH_circ09697 | 0                   | 0           | 0            | 0           | 0.0261        | 0           | 0                 | 0             | 0                     | 0      | 0 |

**E2LLA:** E2 Low Light bioreplicate A**E2HL30A:** E2 High-Light 30 minutes bioreplicate A**E2HL30B:** E2 High-Light 30 minutes bioreplicate B**E2HL2HA:** E2 High-Light 120 minutes bioreplicate A**E2HL2HB:** E2 High-Light 120 minutes bioreplicate B**TNR1LLA:** tnr-1 Low Light bioreplicate A**TNR1HL30A:** tnr-1 High-Light 30 minutes bioreplicate A**TNR1HL30B:** tnr-1 High-Light 120 minutes bioreplicate A
